# Supplementary material for: A cell-laden microfluidic hydrogel
Source: Royal Society of Chemistry journal article supplement (doi:10.1039/b615486g), 2007-01-01
Supplement: b615486g.pdf [file b615486g.pdf]

**SUPPORTING INFORMATION FOR:**

**A Cell-laden Microfluidic Hydrogel**

Yibo Ling<sup>1,2</sup>, Jamie Rubin<sup>3</sup>, Yuting Deng<sup>4</sup>, Catherine Huang<sup>4</sup>, Utkan Demirci<sup>1,5</sup>, Jeffrey M. Karp<sup>3</sup>, Ali Khademhosseini<sup>1,5</sup>.

<sup>1</sup> Harvard-MIT Division of Health Sciences and Technology, Massachusetts Institute of Technology, Cambridge, MA 02139, USA

<sup>2</sup> Department of Electrical Engineering and Computer Science, Massachusetts Institute of Technology, Cambridge, MA 02139, USA

<sup>3</sup> Department of Chemical Engineering, Massachusetts Institute of Technology, Cambridge, MA 02139, USA

<sup>4</sup> Department of Biology, Massachusetts Institute of Technology, Cambridge, MA 02139, USA

<sup>5</sup> Center for Biomedical Engineering, Department of Medicine, Brigham and Women's Hospital, Harvard Medical School, Boston, MA 02115, USA

**Methods**

To determine the viability of cells in channels as a function of both axial distance along and vertical distance away from the channel, the viability of cells within 1.25mm x 0.25mm zones were assessed (n = 3 for each value, an average of 46 cells/zone). Zones were defined at various vertical distances (50 μm, 300 μm, 550 μm, 800 μm, 1050 μm; the labeled values indicate the distance from the channel floor to the floor of the zone) and axial distances (0.0 cm, 1.5 cm, 3.0 cm). Paired t-tests were used to assess statistically significant differences in viability. Due to concerns about human error in cell counting we considered p < 0.005 to be statistically significant (conservative when compared to p < 0.05 used in many typical biological experiments).

## Results

Detailed viability data is presented for PBS flow controls at day 1 (Figure S1), day 2 (Figure S2), and day 3 (Figure S3). On the left hand side the data is binned by both axial distance along and vertical distance above the channel. For all 3 days, no statistically significant differences were found between zones of varying axial distances along the channel (left panel in Figures S1, S2, S3). These three axial values were plotted together ( $n = 9$ , right panel in Figures S1, S2, S3). Here, no significant differences were found between the viability values of different vertical zones.

Detailed viability data is presented for experimental media flow conditions in zones 50  $\mu\text{m}$  (Figure S4), 300  $\mu\text{m}$  (Figure S5), 550  $\mu\text{m}$  (Figure S6), 800  $\mu\text{m}$  (Figure S7), and 1050  $\mu\text{m}$  (Figure S8) above the channel. For all 5 vertical distances, no statistically significant differences were found between zones of varying axial distances along the channel. As such, the data was reorganized by collapsing the axial conditions (resulting samples sizes of  $n = 9$  for each data point) and presented as Figure 6 in the main body of the text.

## Figure Captions

**Figure S1:** Viability data for PBS flow control experiments at day 1 in zones binned by vertical distance above and axial distance along the channel (left panel, n=3) as well as only by vertical distance above the channel (right panel, n = 9). Error bars span 1 standard deviation from the mean.

**Figure S2:** Viability data for PBS flow control experiments at day 2 in zones binned by vertical distance above and axial distance along the channel (left panel, n=3) as well as only by vertical distance above the channel (right panel, n = 9). Error bars span 1 standard deviation from the mean.

**Figure S3:** Viability data for PBS flow control experiments at day 3 in zones binned by vertical distance above and axial distance along the channel (left panel, n=3) as well as only by vertical distance above the channel (right panel, n = 9). Error bars span 1 standard deviation from the mean.

**Figure S4:** Viability data for media flow experimental conditions within a 1.25mm x 0.25mm zone 50  $\mu$ m above the channel floor. Axial distance as well as time course data are plotted (n = 3). Error bars span 1 standard deviation from the mean.

**Figure S5:** Viability data for media flow experimental conditions within a 1.25mm x 0.25mm zone 300  $\mu\text{m}$  above the channel floor. Axial distance as well as time course data are plotted ( $n = 3$ ). Error bars span 1 standard deviation from the mean.

**Figure S6:** Viability data for media flow experimental conditions within a 1.25mm x 0.25mm zone 550  $\mu\text{m}$  above the channel floor. Axial distance as well as time course data are plotted ( $n = 3$ ). Error bars span 1 standard deviation from the mean.

**Figure S7:** Viability data for media flow experimental conditions within a 1.25mm x 0.25mm zone 800  $\mu\text{m}$  above the channel floor. Axial distance as well as time course data are plotted ( $n = 3$ ). Error bars span 1 standard deviation from the mean.

**Figure S8:** Viability data for media flow experimental conditions within a 1.25mm x 0.25mm zone 1050  $\mu\text{m}$  above the channel floor. Axial distance as well as time course data are plotted ( $n = 3$ ). Error bars span 1 standard deviation from the mean.

# PBS Control Day 1

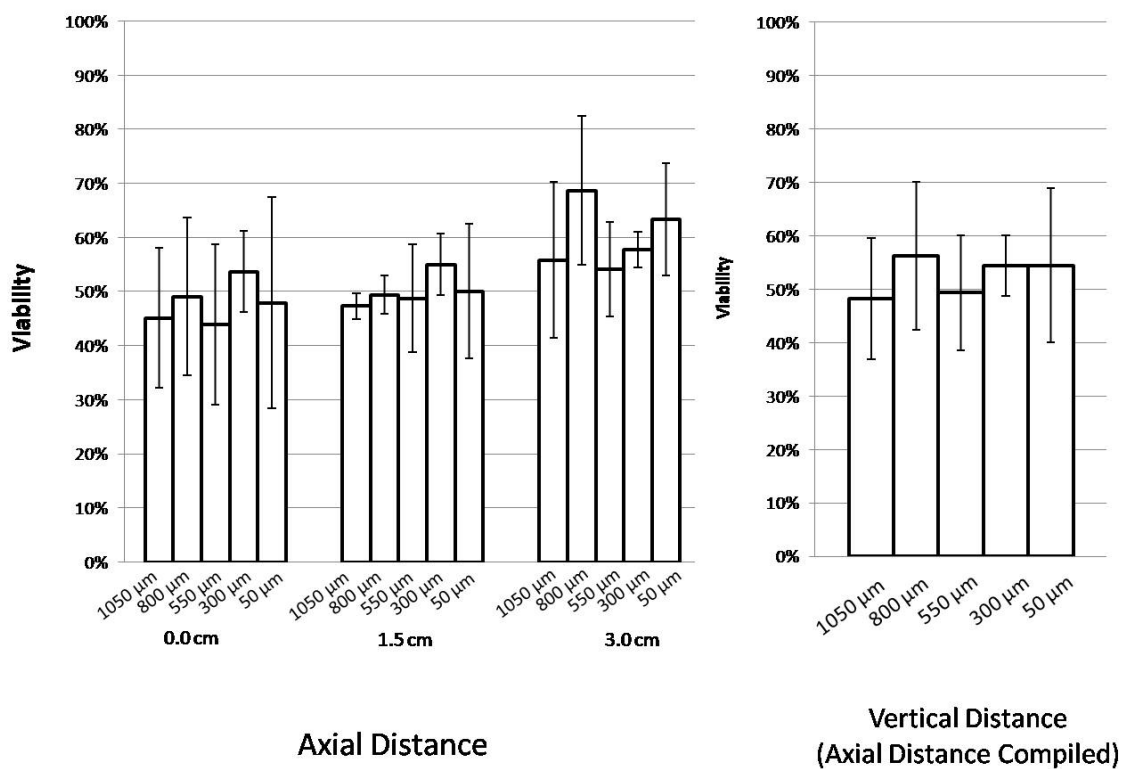

Figure S1

## PBS Control Day 2

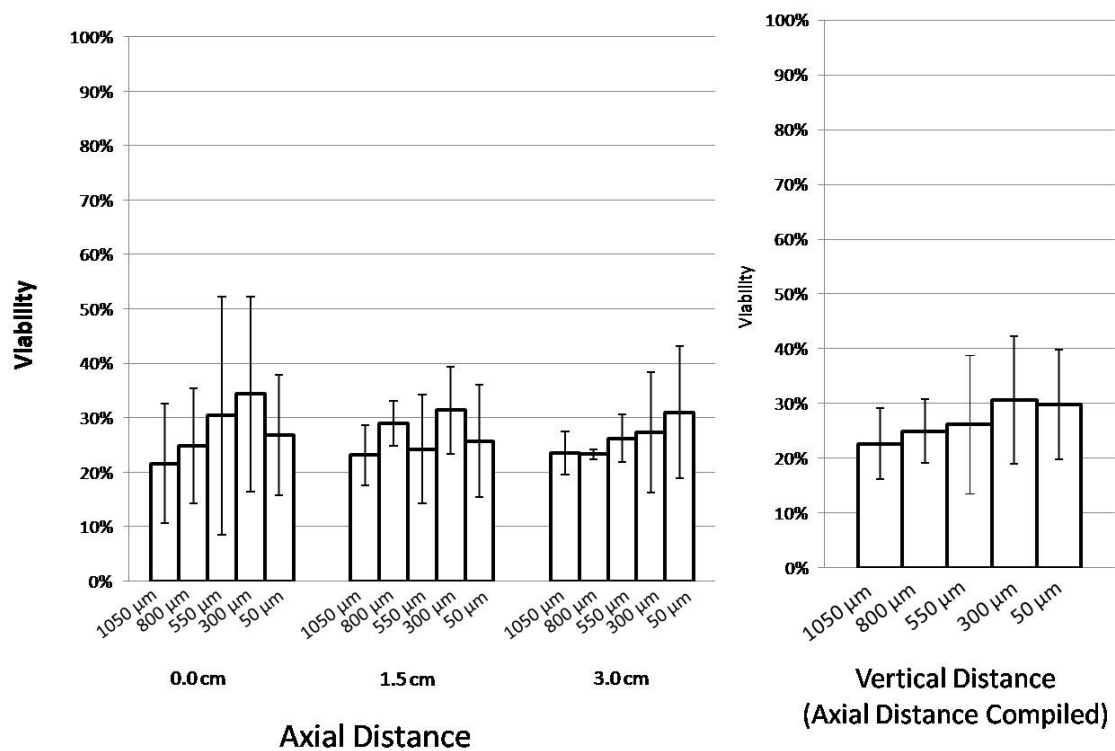

Figure S2

## PBS Control Day 3

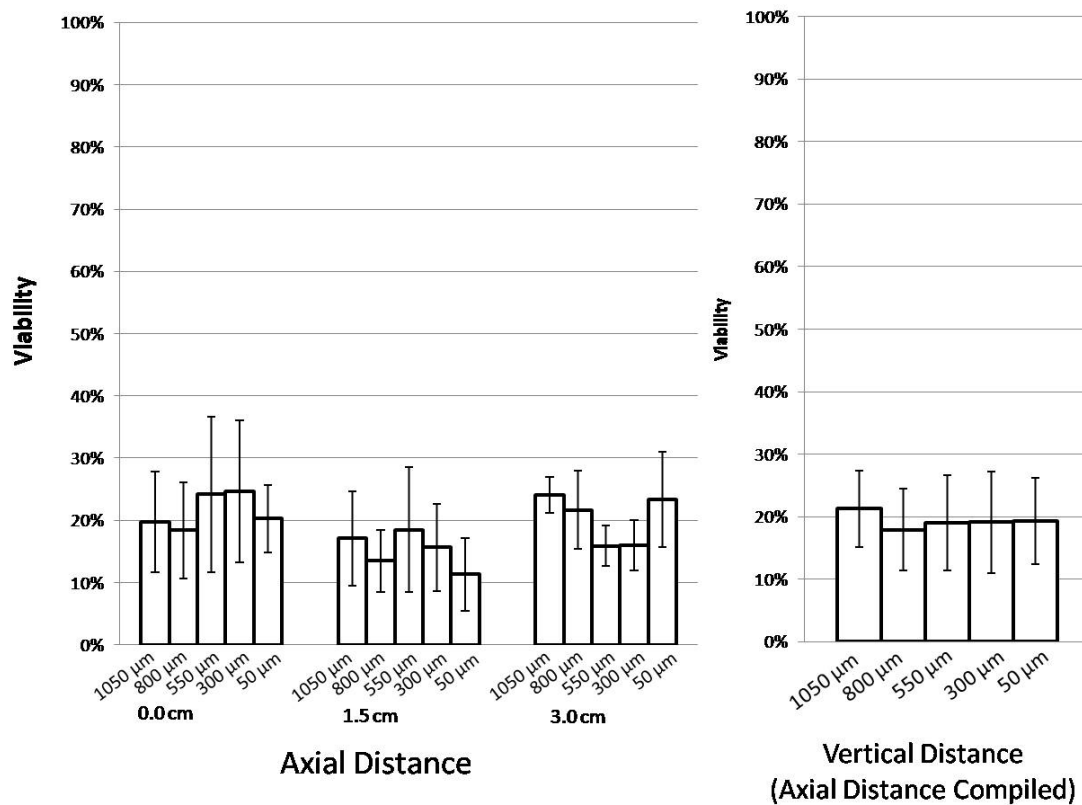

Figure S3

## Experimental 50 $\mu\text{m}$

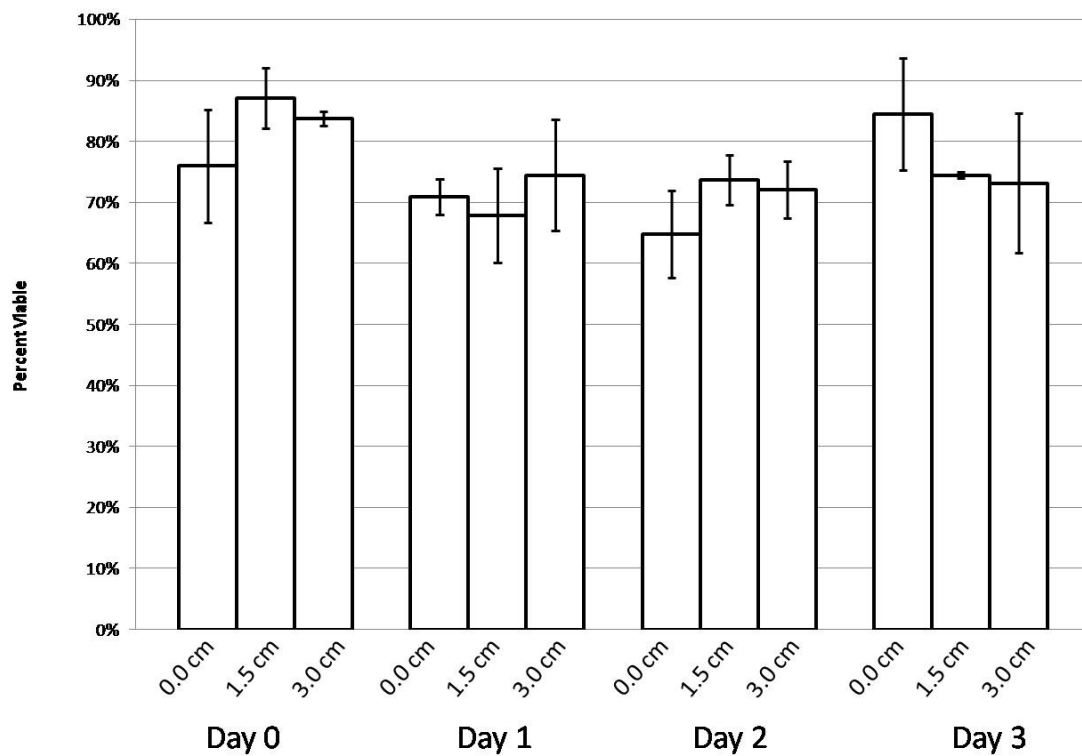

Figure S4



## Experimental 300 $\mu\text{m}$

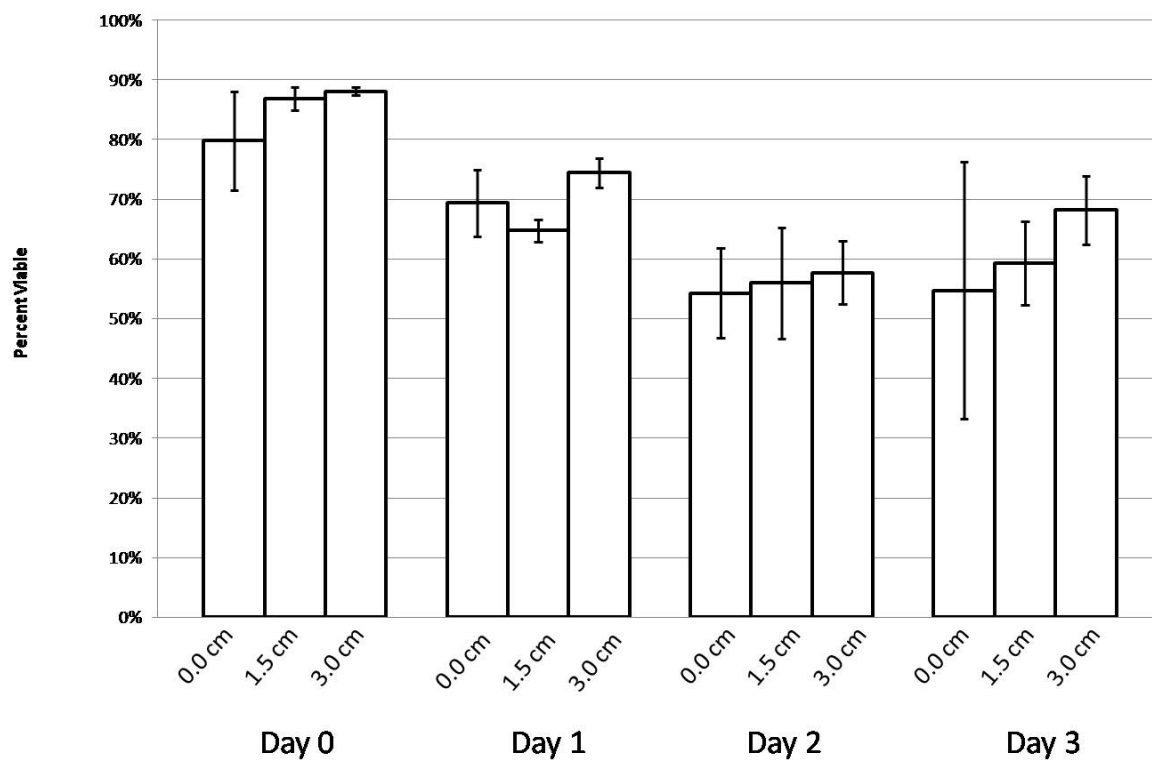

Figure S5

## Experimental 550 $\mu\text{m}$

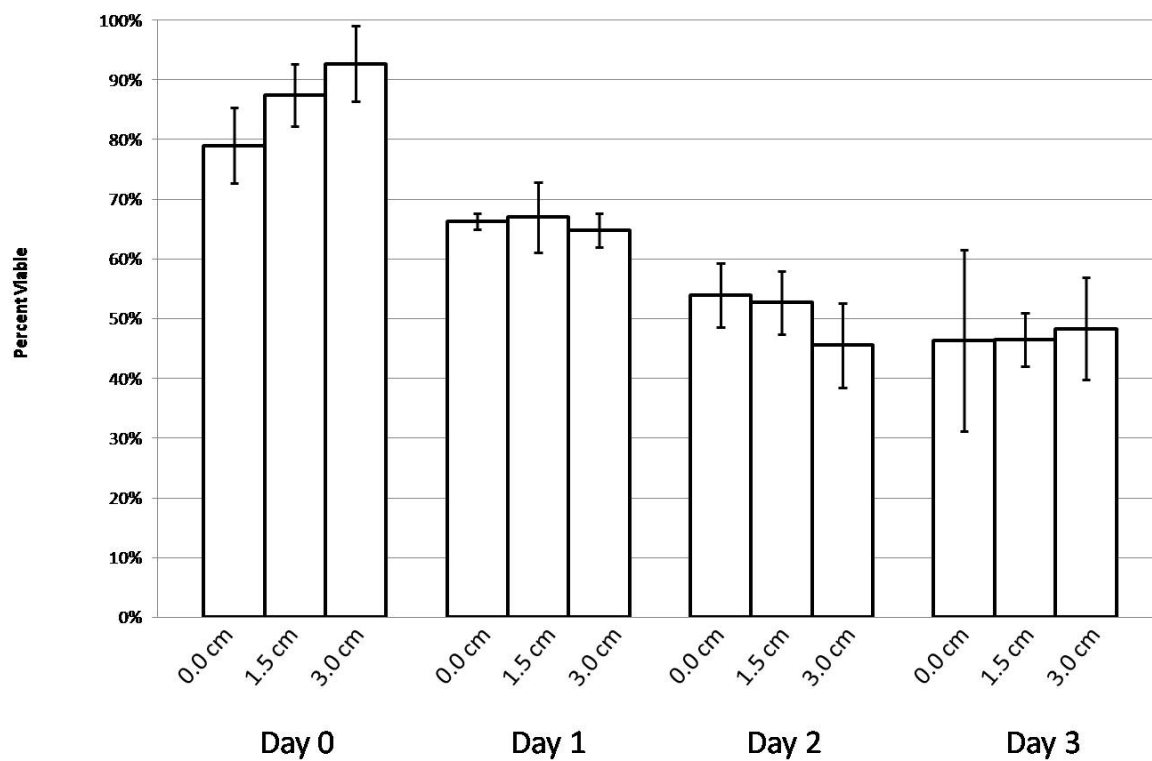

Figure S6

## Experimental 800 $\mu\text{m}$

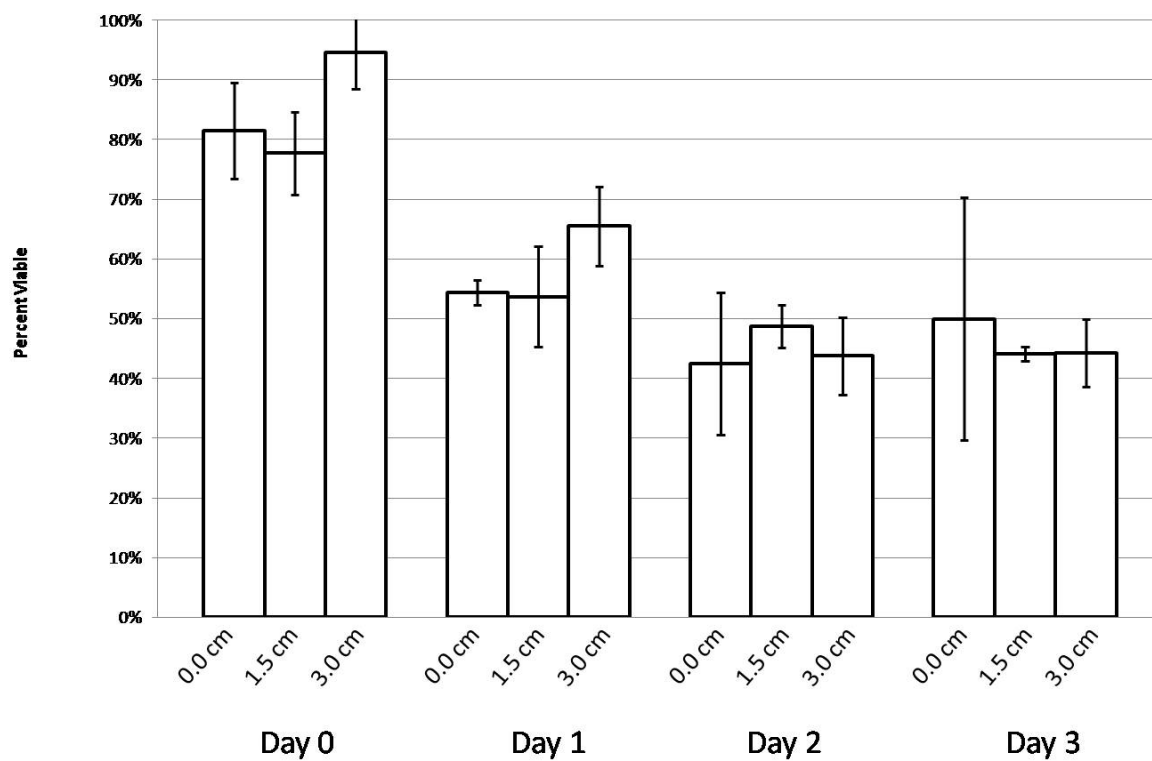

Figure S7

## Experimental 1050 $\mu\text{m}$

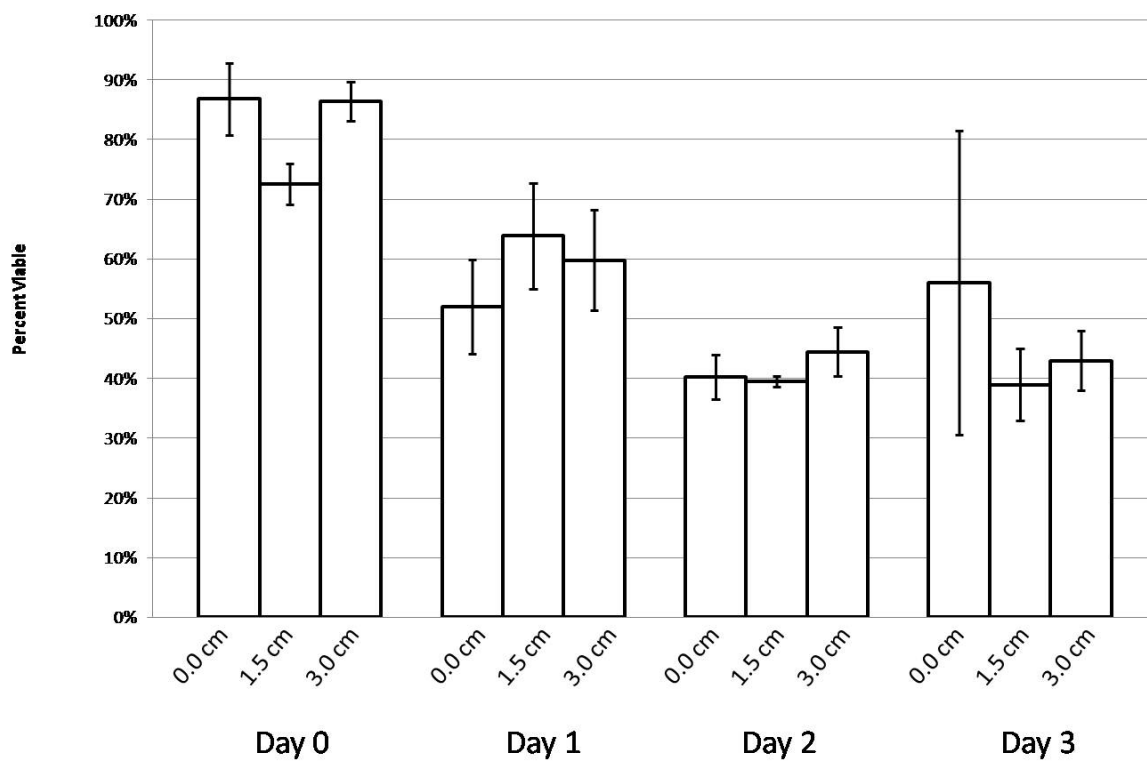

Figure S8
